# Supplementary material
Source: ML conference proceedings conference paper supplement (https://openaccess.thecvf.com/content/ICCV2021/html/DeVries_Unconstrained_Scene_Generation_ICCV_2021_paper.html)
Supplement: Supplementary file 3 [file DeVries_Unconstrained_Scene_Generation_ICCV_2021_supplemental.zip]

Archive with 24 entries (20 files):
- supplementary/
- __MACOSX/._supplementary
- supplementary/.DS_Store
- __MACOSX/supplementary/._.DS_Store
- supplementary/fig1_videos/
- __MACOSX/supplementary/._fig1_videos
- supplementary/gsn-supp.pdf
- __MACOSX/supplementary/._gsn-supp.pdf
- supplementary/scene_editing/
- __MACOSX/supplementary/._scene_editing
- supplementary/gsn_vs_nerf.mov
- supplementary/fig1_videos/sample_3.gif
- __MACOSX/supplementary/fig1_videos/._sample_3.gif
- supplementary/fig1_videos/sample_2.gif
- __MACOSX/supplementary/fig1_videos/._sample_2.gif
- supplementary/fig1_videos/sample_0.gif
- __MACOSX/supplementary/fig1_videos/._sample_0.gif
- supplementary/fig1_videos/sample_1.gif
- __MACOSX/supplementary/fig1_videos/._sample_1.gif
- supplementary/scene_editing/scene_mirroring_2.mov
- supplementary/scene_editing/scene_mirroring_1.mov
- supplementary/scene_editing/scene_mirroring_0.mov
- supplementary/scene_editing/.ipynb_checkpoints/
- __MACOSX/supplementary/scene_editing/._.ipynb_checkpoints
