# Supplementary material
Source: ML conference proceedings conference paper supplement (https://openaccess.thecvf.com/content/ICCV2021/html/DeVries_Unconstrained_Scene_Generation_ICCV_2021_paper.html)

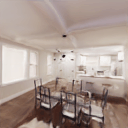

Supplement: Supplementary file 3 [file DeVries_Unconstrained_Scene_Generation_ICCV_2021_supplemental.zip › supplementary/fig1_videos/sample_3.gif]

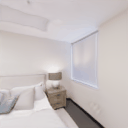

Supplement: Supplementary file 3 [file DeVries_Unconstrained_Scene_Generation_ICCV_2021_supplemental.zip › supplementary/fig1_videos/sample_2.gif]

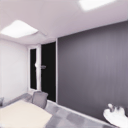

Supplement: Supplementary file 3 [file DeVries_Unconstrained_Scene_Generation_ICCV_2021_supplemental.zip › supplementary/fig1_videos/sample_0.gif]

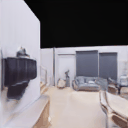

Supplement: Supplementary file 3 [file DeVries_Unconstrained_Scene_Generation_ICCV_2021_supplemental.zip › supplementary/fig1_videos/sample_1.gif]
